# Supplementary material for: Functioning of Fluorescent Proteins in Aggregates in Anthozoa Species and in Recombinant Artificial Models
Source: MDPI journal article supplement (doi:10.3390/ijms18071503), 2017-07-12
Supplement: s1 [file s1]

**Supplementary Movie 1.** Time-lapse fluorescence microscopy of Trio-E57 aggregates (red) and lysosomes (LAMP1-EGFP, green) in HeLa Kyoto cells. Movie shows 135-s time interval, 40 frames.
